# Supplementary material for: Essential factors involved in the precise targeting and insertion of telomere-specific non-LTR retrotransposon, SART1Bm
Source: PubMed Central journal article supplement (PMC7265360; doi:10.1038/s41598-020-65925-x), 2020-06-02
Supplement: 41598_2020_65925_MOESM1_ESM.pdf [file 41598_2020_65925_MOESM1_ESM.pdf]

## Supplementary Material

**Essential factors involved in the precise targeting and insertion of telomere-specific non-LTR retrotransposon, SART 1Bm**

**Authors:**

Narisu Nichuguti\* and Haruhiko Fujiwara\*<sup>1</sup>

**Affiliations:**

\*Department of Integrated Biosciences, Graduate School of Frontier Sciences,

The University of Tokyo, Kashiwa, Chiba, 277-8562, Japan.

<sup>1</sup>**Corresponding author:** Department of Integrated Biosciences, Graduate

School of Frontier Sciences, The University of Tokyo, Bioscience Bldg.,

Kashiwanoha 5-1-5, Kashiwa, Chiba, 277-8562, Japan.

Tel: +81-4-7136-3659; Fax: +81-4-7136-3660;

Email: haruh@edu.k.u-tokyo.ac.jp

**Supplementary Figure S1** Full-length gels regarding data shown in Fig. 1b

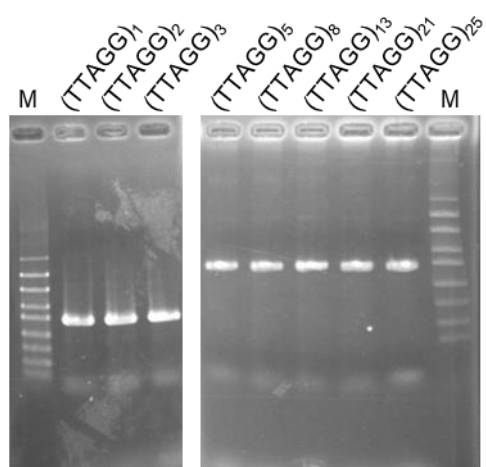



|                                               |                                                |
|-----------------------------------------------|------------------------------------------------|
| (TTTAGGG)3                                    | TTTAGGGTTTAGGGTTTAGGG                          |
| (CCCTAAA)3                                    | CCCTAAACCCTAAACCCTAAA                          |
| <b>EGFP/3'UTR series plasmid</b>              |                                                |
| BamHI-EGFP-S96                                | AAGGATCCATGGTGAGCAAGGGCGAGG                    |
| EcoRI-EGFP-A813                               | AAGAATTCTTACTTGTACAGCTCGTCCATGC                |
| SART1-S6221-EcoRI-Takahashi                   | TTTTTGAATTCGGACCGTCGGGCGTC                     |
| TTT-Xbal-PolyA(0)+SART1 3UTR                  | TTTtctagaGGTATCGATGGGGAATCCC                   |
| TTT-Xbal-PolyA(5)+SART1 3UTR                  | TTTtctagaTTTTTGGTATCGATGGGGAATCCC              |
| TTT-Xbal-PolyA(10)+SART1 3UTR                 | TTTtctagaTTTTTTTTTTGGTATCGATGGGGAATCCC         |
| TTT-Xbal-PolyA(18)+SART1 3UTR                 | TTTtctagaTTTTTTTTTTTTTTTTTTGGTATCGATG          |
| TTT-Xbal-PolyC(18)+SART1 3UTR                 | TTTtctagaGGGGGGGGGGGGGGGGGGGGTATCGATGGGGAATCCC |
| TTT-Xbal-PolyA(0)AGG+SART1 3UTR               | TTTtctagaCCTGGTATCGATGGGGAATCCC                |
| <b>Ex vivo retrotransposition assay</b>       |                                                |
| S16131                                        | AGAAAGAGAGTGCGACCCAAACTCAGTT                   |
| A878T                                         | GGCTGCAGGAATTCAGTAGTGATT                       |
| Amp-F1                                        | GAACGTTTTCCAATGATGAGCACTT                      |
| Amp-R1                                        | CCAATGCTTAATCAGTGAGGCACC                       |
| <b>Trans-in vivo retrotransposition assay</b> |                                                |
| pEGFP1-S688                                   | GACAACCACTACCTGAGCACC                          |
| CCTAA6                                        | CCTAACCTAACCTAACCTAA CCTAACCTAA                |

**Supplementary Table 2. Artifactual baculovirus sequences detected in *ex vivo* assay.**

| Synthetic baculovirus AcMNPV-WIV-Syn1, complete sequence (ID: KY792989.1) |                  |                |               |                                                           |                                                                                                                                                                                                                                                                                                                                                                                                                                                                                                  |
|---------------------------------------------------------------------------|------------------|----------------|---------------|-----------------------------------------------------------|--------------------------------------------------------------------------------------------------------------------------------------------------------------------------------------------------------------------------------------------------------------------------------------------------------------------------------------------------------------------------------------------------------------------------------------------------------------------------------------------------|
| Type                                                                      | Query Length(bp) | Sbjct (bp)     | Identities    | Forward primer: S16131<br>AGAAAGAGAGTGCAGCCAAACTCA<br>GTT | Reverse Primer: A878T<br>GGCTGCA-<br>GGAATCACTAGTGATT                                                                                                                                                                                                                                                                                                                                                                                                                                            |
| 1                                                                         | 398 (8-398)      | 36785 to 37175 | 391/391(100%) | AGAAAGAGAGTGCAGCCAAACTCA<br>GTT                           | GCACCTCAGGCGAAAGAGACGGATTTTAAATCAAATAATCATGGGTTTATTTGCAACAAACACAATTTGGCGTTTACAGCA<br>TTTGTATACACACAGAACTCATATTTTATATTTTTCGTAACTTCCTAATGATCACAATTTATACATAATCAAAGAA<br>TCGTACGAATATTATAAAACAATTTGATTTGTTATTTAAAAACGATTCATTTACTTGGAACTGCGTTTACCACGACGAGCG<br>TCTGAATCGAGTTCAAAGCTTTGGCTTTTCAGCTTAGGCTTTAGTGAGTCTGGAAGATCCGGAACAATGTCGCGGTCAAT<br>ATGGATTGAATTTCTGAGATCTTAGTGTAAAGTCCGTCATTTGAGCGGGCAACCGTCCAAAAGCTGGAATGATCTTCC<br>AGCCCGTTAACTGAGTTGGTTCGCACTCTCTTCT                               |
| 2                                                                         | 425 (39-425)     | 36785 to 37171 | 387/387(100%) | AGAAAGAGAGTGCAGCCAAACTCA<br>GTT                           | GCACCTCAGGCGAAAGAGACGACCTCCCAACCGCAGACGCGCGCGCAGCTCAATCAAATAATCATGGGTTTATTTGCA<br>ACAAACACAATTTGGCGTTTACAGCATTGTTATACACACAGAACTCATATTTTATATTTTTCGTAACTTCCTAATG<br>ATCACATTTTATACATAATCAAAGAACTGACGAATATTATAAAACAATTTGATTTGTTATTTAAAAACGATTCATTTAC<br>TTGGAAGTCCGTTTACCACGACGAGCGTCTGAATCGAGTTCAAAGCTTTGGCTTTTCAGCTTAGGCTTTAGTGAGTCTGGA<br>AGATCCGGAACAATGTCGCGGTCAATATGATTTGAATTTCTGAGATCTTAGTGTAAAGTCCGTCATTTGAGCGGGCAAA<br>CCGTCAAAAGCTGGAATGATTTCCAGCCCGTTTAACTGAGTTGGTTCGCACTCTCTTCT         |
| 3                                                                         | 378 (1-375)      | 36800 to 37174 | 374/375(99%)  | AGAAAGAGAGTGCAGCCAAACTCA<br>GTT                           | GCACCTCAGGCGAAAGATCATTCCAGCTTTGGACGGTTTGGCCGCTCAATTGACCGATCTTAACACTAAGATCTCAGAAAT<br>TCAATCCATATTGACCGCGACATTTGTCGGATCTCCAGACTCACTAAGCCTAAGCTGAAAAGCCAAAGCTTTTGAATC<br>CGATTCAGACGCTCGTGGTAAACGCACTCCAAAGTAAATGAATCGTTTTTAAAAAACAATCAATGTTTTATAATA<br>TTCTGATGATTTCTGATTTGTAATAAAATGTCATTTAGGAAGATTACGAAAAATATAAAAAATATGAGTCTCTGTGTG<br>TATAACAATGCTGTAACGCCCAATTTGTTTGTGCAATAAACCCATGATTTTGAATTAACGCAACTGAGTTTGG<br>GTCGCACTCTCTTCT                                                             |
| 4                                                                         | 439 (1-364)      | 36774 to 37163 | 363/364(99%)  | AGAAAGAGAGTGCAGCCAAACTCA<br>GTT                           | GCACCTCAGGCGAAAGATCATTCCAGCTTTGGACGGTTTGGCCGCTCAATTGACCGATCTTAACACTAAGATCTCAGAAAT<br>TCAATCCATATTGACCGCGACATTTGTCGGATCTCCAGACTCACTAAGCCTAAGCTGAAAAGCCAAAGCTTTTGAATC<br>CGATTCAGACGCTCGTGGTAAACGCACTCCAAAGTAAATGAATCGTTTTTAAAAAACAATCAATGTTTTATAATA<br>TTCTGATGATTTCTGATTTGTAATAAAATGTCATTTAGGAAGATTACGAAAAATATAAAAAATATGAGTCTCTGTGTG<br>TATAACAATGCTGTAACGCCCAATTTGTTTGTGCAATAAACCCATGATTTTGAATTAACGCAACTGAGTTTGG<br>GTCGCACTCTCTTCT                                                             |
| 5                                                                         | 441 (59-441)     | 36785 to 37167 | 383/383(100%) | Reverse Primer: A878T<br>GGCTGCA-GGAATCACTAGTGATT         | AGAAAGAGAGTGCAGCCAAACTCAGTTGCACCTCAGGCGAAAGAGACGGGTTGGCGCGCGGGCGAAGGCCCGGCTCA<br>GCTCAAATAATCATGGGTTTATTTGCAACAAACACAATTTGGCGTTTACAGCATTGTTTATACACACAGAACTCATATTT<br>TTTTATATTTTTCGTAACTTCCTAATGATCACAATTTTATACATAATCAAAGAACTGACGAATATTATAAAACAATTTGA<br>TTTGTATTTTAAAAACGATTCATTTACTTGAACGCTGCTTTACACGACGAGCGTCTGAATCGAGTTCAAAGCTTTGGCT<br>TTTCAGCTTAGGCTTTAGTGAGTCTGGAAGATCCGGAACAATGTCGCGGTCAATATGATTTGAATTTCTGAGATCTTAGT<br>GTTAAGATCCGTCATTTGAGCGGGCAACCGTCCAAAAGCTGGAATGATTTCTCCAGCCCGTT   |
| 6                                                                         | 393 (4-393)      | 36785 to 37174 | 389/390(99%)  | GGCGGCCGGAATCACTAGTGATT                                   | AGAAAGAGAGTGCAGCCAAACTCAGTTGCACCTCAGGCGAAAGAGACGGGTTGGCGCGCGGGCGAAGGCCCGGCTCA<br>TACAGCATTGTTTATACACACAGAACTCATATTTTATATTTTTCGTAACTTCCTAATGATCACAATTTTATACATAAT<br>CAAAGAACTACAGAAATATTATAAAACAATTTGATTTGTTATTTAAAAACGATTCATTTACTTGAACGCTGCTTTACACG<br>ACGAGCGCTGATCGAGTTCAAAGCTTTGGCTTTTCAGCTTAGGCTTTAGTGAGTCTGGAAGATCCGGAACAATGTCGCG<br>GGTCAATATGATTTGAATTTCTGAGATCTTAGTGTAAAGTCCGTCATTTGAGCGGGCAACCGTCCAAAAGCTGGAATGA<br>TTCTTCCAGCCCGTT                                                     |
| 7                                                                         | 442 (1-384)      | 36785 to 37167 | 381/384(99%)  | GGCGGCCGGAATCACTAGTGATT                                   | AGAAAGAGAGTGCAGCCAAACTCAGTTAAACGGGCTGGAAGAATCATTTCCANNNTTTTGGACGGTTTGGCCGCTCAATTG<br>ACCGATCTTAACACTAAGATCTCAGAAATCAATCCATATTGACCGCGACATTTGTCGGATCTCCAGACTCACTAAAG<br>CCTAAGCTGAAAAGCCAAAGCTTTGAACTCGATTTCAGACGCTCGTCTGGTAAACGCACTCCAAAGTAAATGAATCGTTTT<br>TAAAATAACAAATCAATTTGTTTATAATATTCGTACGATTTCTTGTATGTAATAAAATGTCATATTAGGAAGATTACG<br>AAAAATATAAAAAATATGAGTTCTGTGTATAACAATGCTGTAACGCCCAATTTGTTTGTGCAATAAACCCATG<br>ATTATTTGAGTGAAGCGGGGGCCCTTCGCCCGCGCCCGCCCGCTCTTTCCGCTGAGTGC            |
| 8                                                                         | 456 (1-390)      | 36785 to 37175 | 390/391(99%)  | GGCGGCCGGAATCACTAGTGATT                                   | AGAAAGAGAGTGCAGCCAAACTCAGTTAAACGGGCTGGAAGAATCATTTCCAGCTTTTGGACGGTTTGGCCGCTCAATTGA<br>CCGATCTTAACACTAAGATCTCAGAAATCAATCCATATTGACCGCGACATTTGTCGGATCTCCAGACTCACTAAAGC<br>CTAAGCTGAAAAGCCAAAGCTTTGAACTCGATTTCAGACGCTCGTCTGGTAAACGCACTCCAAAGTAAATGAATCGTTTT<br>AAAAATAACAAATCAATTTGTTTATAATATTCGTACGATTTCTTGTATGTAATAAAATGTCATATTAGGAAGATTACG<br>AAAAATAAAAAATATGAGTTCTGTGTATAACAATGCTGTAACGCCCAATTTGTTTGTGCAATAAACCCATGAT<br>TATTTGATTAATAAAAAAAGCTGAGCGGGGGCCCTTCGCCCGCGCCCGCCCGCTCTTTCTGCTGAGTGC   |
| 9                                                                         | 426 (1-392)      | 36785 to 37175 | 390/392(99%)  | GGCGGCCGGAATCACTAGTGATT                                   | AGAAAGAGAGTGCAGCCAAACTCAGTTAAACGGGCTGGAAGAATCATTTCCAGCTTTTGGACGGTTTGGCCGCTCAATTG<br>ACCGATCTTAACACTAAGATCTCAGAAATCAATCCATATTGACCGCGACATTTGTCGGATCTCCAGACTCACTAAAG<br>CCTAAGCTGAAAAGCCAAAGCTTTGAACTCGATTTCAGACGCTCGTCTGGTAAACGCACTCCAAAGTAAATGAATCGTTTT<br>TAAAATAACAAATCAATTTGTTTATAATATTCGTACGATTTCTTGTATGTAATAAAATGTCATATTAGGAAGATTACG<br>AAAAATATAAAAAATATGAGTTCTGTGTATAACAATGCTGTAACGCCCAATTTGTTTGTGCAATAAACCCATG<br>ATTATTTGATTAATAAAAAAAGCTGAGCGGGGGCCCTTCGCCCGCGCCCGCCCGCTCTTTCTGCTGAGTGC |
| 10                                                                        | 391 (1-390)      | 36785 to 37174 | 388/390(99%)  | GGCGGCCGGAATCACTAGTGATT                                   | AAAGAGAGTGCAGCCAAACTCAGTTAAACGGGCTGGAAGAATCATTTCCAGCTTTTGGACGGTTTGGCCGCTCAATTGACC<br>GATCTTAACACTAAGATCTCAGAAATCAATCCATATTGACCGCGACATTTGTCGGATCTCCAGACTCACTAAAGCCT<br>AAGCTGAAAAGCCAAAGCTTTGAACTCGATTTCAGACGCTCGTCTGGTAAACGCACTCCAAAGTAAATGAATCGTTTTAA<br>AATAACAATCAATTTGTTTATAATATTCGTACGATTTCTTGTATGTAATAAAATGTCATATTAGGAAGATTACGAAA<br>AATATAAAAAATATGAGTTCTGTGTATAACAATGCTGTAACGCCCAATTTGTTTGTGCAATAAACCCATGAT                                                                              |
| 11                                                                        | 455 (1-392)      | 36785 to 37175 | 387/392(99%)  | GGCGGCCGGAATCACTAGTGATT                                   | AGAAAGAGAGTGCAGCCAAACTCAGTTAAACGGGCTGGAAGAATCATTTCCANNNTTTTGGACGGTTTGGCCGCTCAATTG<br>ACCGATCTTAACACTAAGATCTCAGAAATCAATCCATATTGACCGCGACATTTGTCGGATCTCCAGACTCACTAAAG<br>CCTAAGCTGAAAAGCCAAAGCTTTGAACTCGATTTCAGACGCTCGTCTGGTAAACGCACTCCAAAGTAAATGAATCGTTTT<br>TAAAATAACAAATCAATTTGTTTATAATATTCGTACGATTTCTTGTATGTAATAAAATGTCATATTAGGAAGATTACG<br>AAAAATATAAAAAATATGAGTTCTGTGTATAACAATGCTGTAACGCCCAATTTGTTTGTGCAATAAACCCATG<br>ATTGTTGATTAATAAAAAAAGCTGAGCGGGGGCCCTTCGCCCGCGCCCGCCCGCTCTTTCTGCTGAGTGC |
| 12                                                                        | 412 (1-391)      | 36785 to 37175 | 390/391(99%)  | GGCGGCCGGAATCACTAGTGATT                                   | AGAAAGAGAGTGCAGCCAAACTCAGTTAAACGGGCTGGAAGAATCATTTCCAGCTTTTGGACGGTTTGGCCGCTCAATTGA<br>CCGATCTTAACACTAAGATCTCCAGAAATCAATCCATATTGACCGCGACATTTGTCGGATCTCCAGACTCACTAAAGC<br>CTAAGCTGAAAAGCCAAAGCTTTGAACTCGATTTCAGACGCTCGTCTGGTAAACGCACTCCAAAGTAAATGAATCGTTTT<br>AAAAATAACAAATCAATTTGTTTATAATATTCGTACGATTTCTTGTATGTAATAAAATGTCATATTAGGAAGATTACG<br>AAAAATATAAAAAATATGAGTTCTGTGTATAACAATGCTGTAACGCCCAATTTGTTTGTGCAATAAACCCATG<br>TTATTTGATTAATAAACCCGCTCTTTCCGCTGAGTGC                                  |

**Supplementary Table 3. Nucleotide sequence of the 3' junction of *ex vivo* retrotransposed SART1Bm and point mutated (TTAGG) tracts**

| Lane | Target plasmid        | SART1Bm 3' UTR/(A) <sub>n</sub> | Telomeric repeats        | Vector sequence | Clones |
|------|-----------------------|---------------------------------|--------------------------|-----------------|--------|
| 2    | (CTAGG) <sub>42</sub> | ---CATCGATACC(A) <sub>30</sub>  | AGG(CTAGG) <sub>22</sub> | AATCACTAGT---   | 1      |
|      |                       | ---CATCGATACC(A) <sub>54</sub>  | AGG(CTAGG) <sub>9</sub>  | AATCACTAGT---   | 1      |
|      |                       | ---CATCGATACC(A) <sub>29</sub>  | AGG(CTAGG) <sub>29</sub> | AATCACTAGT---   | 1      |
|      |                       | ---CATCGATACC(A) <sub>37</sub>  | AGG(CTAGG) <sub>32</sub> | AATCACTAGT---   | 1      |
|      |                       | ---CATCGATACC(A) <sub>29</sub>  | AGG(CTAGG) <sub>32</sub> | AATCACTAGT---   | 1      |
| 3    | (TCAGG) <sub>23</sub> | ---CATCGATACC(A) <sub>36</sub>  | AGG(TCAGG) <sub>19</sub> | AATCACTAGT---   | 1      |
|      |                       | ---CATCGATACC(A) <sub>10</sub>  | AGG(TCAGG) <sub>11</sub> | AATCACTAGT---   | 1      |
|      |                       | ---CATCGATACC(A) <sub>23</sub>  | AGG(TCAGG) <sub>3</sub>  | AATCACTAGT---   | 1      |
|      |                       | ---CATCGATACC(A) <sub>25</sub>  | AGG(TCAGG) <sub>9</sub>  | AATCACTAGT---   | 1      |
| 4    | (TTCGG) <sub>35</sub> |                                 |                          |                 | 0      |
| 5    | (TTAGG) <sub>30</sub> | ---CATCGATACC(A) <sub>47</sub>  | ACG(TTACG) <sub>9</sub>  | AATCACTAGT---   | 1      |
|      |                       | ---CATCGATACC(A) <sub>18</sub>  | ACG(TTACG) <sub>19</sub> | AATCACTAGT---   | 1      |
|      |                       | ---CATCGATACC(A) <sub>15</sub>  | ACG(TTACG) <sub>14</sub> | AATCACTAGT---   | 1      |
| 6    | (TTAGC) <sub>32</sub> | ---CATCGATACC(A) <sub>20</sub>  | AGC(TTAGC) <sub>12</sub> | AATCACTAGT---   | 1      |
|      |                       | ---CATCGATACC(A) <sub>36</sub>  | AGC(TTAGC) <sub>12</sub> | AATCACTAGT---   | 1      |
|      |                       | ---CATCGATACC(A) <sub>31</sub>  | AGC(TTAGC) <sub>3</sub>  | AATCACTAGT---   | 1      |

**Supplementary Table 4. Nucleotide sequence of the 3' junction of *ex vivo* retrotransposed SART1Bm and telomeric repeats of other species**

| Lane | Target plasmid         | SART1Bm 3' UTR/(A) <sub>n</sub> | Telomeric repeats           | Vector sequence | Clones |
|------|------------------------|---------------------------------|-----------------------------|-----------------|--------|
| 2    | (TTAGGG) <sub>34</sub> | ---CATCGATACC(A) <sub>29</sub>  | AGGG(TTAGGG) <sub>31</sub>  | AATCACTAGT---   | 1      |
|      |                        | ---CATCGATACC(A) <sub>18</sub>  | AGGG(TTAGGG) <sub>7</sub>   | AATCACTAGT---   | 1      |
| 3    | (TTAGGC) <sub>23</sub> | ---CATCGATACC(A) <sub>14</sub>  | AGGC(TTAGGC) <sub>12</sub>  | AATCACTAGT---   | 1      |
| 4    | (TTAGGG) <sub>21</sub> | ---CATCGATACC(A) <sub>29</sub>  | AGGG(TTTAGGG) <sub>3</sub>  | AATCACTAGT---   | 1      |
|      |                        | ---CATCGATACC(A) <sub>17</sub>  | AGGG(TTTAGGG) <sub>2</sub>  | AATCACTAGT---   | 1      |
|      |                        | ---CATCGATACC(A) <sub>27</sub>  | AGGG(TTTAGGG) <sub>11</sub> | AATCACTAGT---   | 1      |

**Supplementary Table 5. Nucleotide sequence of 3' junction clones obtained from the EGFP/ SART1 3' UTR/(A)<sub>n</sub> construct.**

| Reporter | EGFP/EcoRI         | SART1Bm 3' UTR/(A) <sub>n</sub>   | Telomeric repeats        | 6 |
|----------|--------------------|-----------------------------------|--------------------------|---|
| <b>b</b> | ---TACAAGTAAgaattc | GGACCGT---GATACC(A) <sub>16</sub> | AGG(TTAGG) <sub>7</sub>  | 1 |
|          | ---TACAAGTAAgaattc | GGACCGT---GATACC(A) <sub>29</sub> | AGG(TTAGG) <sub>32</sub> | 1 |
|          | ---TACAAGTAAgaattc | GGACCGT---GATACC(A) <sub>18</sub> | AGG(TTAGG) <sub>57</sub> | 1 |
|          | ---TACAAGTAAgaattc | GGACCGT---GATACC(A) <sub>7</sub>  | AGG(TTAGG) <sub>8</sub>  | 1 |
|          | ---TACAAGTAAgaattc | GGACCGT---GATACC(A) <sub>21</sub> | AGG(TTAGG) <sub>27</sub> | 1 |
|          | ---TACAAGTAAgaattc | GGACCGT---GATACC(A) <sub>14</sub> | AGG(TTAGG) <sub>12</sub> | 1 |



**Supplementary Table 6. Nucleotide sequence of 3' junction clones obtained from the A-0 and A-5 donor constructs**

| Reporter | EGFP/EcoRI         | SART1Bm 3' UTR                           | Telomeric repeats                | Clone |
|----------|--------------------|------------------------------------------|----------------------------------|-------|
| A-0      | ---TACAAGTAAgaattc | GGACCGT---TG <u>AGG</u> <sup>-394*</sup> | <u>AGG</u> (TTAGG) <sub>5</sub>  | 1     |
|          | ---TACAAGTAAgaattc | GGACCGT---TG <u>AGG</u> <sup>-394*</sup> | <u>AGG</u> (TTAGG) <sub>6</sub>  | 1     |
|          | ---TACAAGTAAgaattc | GGACCGT---TG <u>AGG</u> <sup>-394*</sup> | <u>AGG</u> (TTAGG) <sub>12</sub> | 1     |
|          | ---TACAAGTAAgaattc | GGACCGT---TG <u>AGG</u> <sup>-394*</sup> | <u>AGG</u> (TTAGG) <sub>38</sub> | 1     |
|          | ---TACAAGTAAgaattc | GGACCGT---TG <u>AGG</u> <sup>-394*</sup> | <u>AGG</u> (TTAGG) <sub>41</sub> | 1     |
|          | ---TACAAGTAAgaattc | GGACCGT---TT <sup>-398</sup>             | AGG(TTAGG) <sub>8</sub>          | 1     |
|          | ---TACAAGTAAgaattc | GGACCGT---GATACC(A) <sub>16</sub>        | AGG(TTAGG) <sub>8</sub>          | 1     |
|          | ---TACAAGTAAgaattc | GGACCGT---GATACC(A) <sub>18</sub>        | AGG(TTAGG) <sub>9</sub>          | 1     |
|          | ---TACAAGTAAgaattc | GGACCGT---GATACC(A) <sub>17</sub>        | AGG(TTAGG) <sub>10</sub>         | 1     |
|          | ---TACAAGTAAgaattc | GGACCGT---GATACC(A) <sub>13</sub>        | AGG(TTAGG) <sub>10</sub>         | 1     |
|          | ---TACAAGTAAgaattc | GGACCGT---GATACC(A) <sub>27</sub>        | AGG(TTAGG) <sub>15</sub>         | 1     |
| A-5      | ---TACAAGTAAgaattc | GGACCGT---TG <u>AGG</u> <sup>-394*</sup> | <u>AGG</u> (TTAGG) <sub>6</sub>  | 1     |
|          | ---TACAAGTAAgaattc | GGACCGT---TG <u>AGG</u> <sup>-394*</sup> | <u>AGG</u> (TTAGG) <sub>9</sub>  | 1     |
|          | ---TACAAGTAAgaattc | GGACCGT---GATACC(A) <sub>17</sub>        | AGG(TTAGG) <sub>1</sub>          | 1     |
|          | ---TACAAGTAAgaattc | GGACCGT---GATACC(A) <sub>24</sub>        | AGG(TTAGG) <sub>6</sub>          | 1     |
|          | ---TACAAGTAAgaattc | GGACCGT---GATACC(A) <sub>20</sub>        | AGG(TTAGG) <sub>6</sub>          | 1     |
|          | ---TACAAGTAAgaattc | GGACCGT---GATACC(A) <sub>15</sub>        | AGG(TTAGG) <sub>8</sub>          | 1     |
|          | ---TACAAGTAAgaattc | GGACCGT---GATACC(A) <sub>20</sub>        | AGG(TTAGG) <sub>9</sub>          | 1     |
|          | ---TACAAGTAAgaattc | GGACCGT---GATACC(A) <sub>24</sub>        | AGG(TTAGG) <sub>11</sub>         | 1     |
|          | ---TACAAGTAAgaattc | GGACCGT---GATACC(A) <sub>23</sub>        | AGG(TTAGG) <sub>12</sub>         | 1     |
|          | ---TACAAGTAAgaattc | GGACCGT---GATACC(A) <sub>21</sub>        | AGG(TTAGG) <sub>16</sub>         | 1     |

\*Nucleotide positions are indicated with the junction of cleavage target site AGG and 3'UTR end, defined as 0. The telomeric repeat-like sequences AGG in the end of inserted copies are underlined and indicated at upstream -394.

**Supplementary Table 7. Nucleotide sequence of 3' junction clones obtained from the A-10 and A-18 donor constructs**

| Reporter | EGFP/EcoRI         | SART1Bm 3' UTR                     | Telomeric repeats        | Clone |
|----------|--------------------|------------------------------------|--------------------------|-------|
| A-10     | ---TACAAGTAAgaattc | GGACCGT---GATACC(A) <sub>26</sub>  | AGG(TTAGG) <sub>1</sub>  | 1     |
|          | ---TACAAGTAAgaattc | GGACCGT---GATACC (A) <sub>28</sub> | AGG(TTAGG) <sub>1</sub>  | 1     |
|          | ---TACAAGTAAgaattc | GGACCGT---GATACC (A) <sub>20</sub> | AGG(TTAGG) <sub>3</sub>  | 1     |
|          | ---TACAAGTAAgaattc | GGACCGT---GATACC (A) <sub>28</sub> | AGG(TTAGG) <sub>5</sub>  | 1     |
|          | ---TACAAGTAAgaattc | GGACCGT---GATACC(A) <sub>10</sub>  | AGG(TTAGG) <sub>12</sub> | 1     |
|          | ---TACAAGTAAgaattc | GGACCGT---GATACC (A) <sub>29</sub> | AGG(TTAGG) <sub>21</sub> | 1     |
|          | ---TACAAGTAAgaattc | GGACCGT---GATACC (A) <sub>29</sub> | AGG(TTAGG) <sub>25</sub> | 1     |
|          | ---TACAAGTAAgaattc | GGACCGT---GATACC (A) <sub>20</sub> | AGG(TTAGG) <sub>30</sub> | 1     |
|          | ---TACAAGTAAgaattc | GGACCGT---GATACC (A) <sub>11</sub> | AGG(TTAGG) <sub>55</sub> | 1     |
|          | ---TACAAGTAAgaattc | GGACCGT---GATACC (A) <sub>29</sub> | AGG(TTAGG) <sub>65</sub> | 1     |
| A-18     | ---TACAAGTAAgaattc | GGACCGT---GATACC (A) <sub>16</sub> | AGG(TTAGG) <sub>7</sub>  | 1     |
|          | ---TACAAGTAAgaattc | GGACCGT---GATACC (A) <sub>7</sub>  | AGG(TTAGG) <sub>8</sub>  | 1     |
|          | ---TACAAGTAAgaattc | GGACCGT---GATACC (A) <sub>17</sub> | AGG(TTAGG) <sub>8</sub>  | 1     |
|          | ---TACAAGTAAgaattc | GGACCGT---GATACC (A) <sub>29</sub> | AGG(TTAGG) <sub>9</sub>  | 1     |
|          | ---TACAAGTAAgaattc | GGACCGT---GATACC (A) <sub>14</sub> | AGG(TTAGG) <sub>12</sub> | 1     |
|          | ---TACAAGTAAgaattc | GGACCGT---GATACC (A) <sub>9</sub>  | AGG(TTAGG) <sub>22</sub> | 1     |
|          | ---TACAAGTAAgaattc | GGACCGT---GATACC (A) <sub>12</sub> | AGG(TTAGG) <sub>22</sub> | 1     |
|          | ---TACAAGTAAgaattc | GGACCGT---GATACC (A) <sub>21</sub> | AGG(TTAGG) <sub>27</sub> | 1     |
|          | ---TACAAGTAAgaattc | GGACCGT---GATACC (A) <sub>29</sub> | AGG(TTAGG) <sub>32</sub> | 1     |
|          | ---TACAAGTAAgaattc | GGACCGT---GATACC (A) <sub>18</sub> | AGG(TTAGG) <sub>57</sub> | 1     |

**Supplementary Table 8. Nucleotide sequence of 3' junction clones obtained from the A-AGG and C-18 donor constructs**

| Reporter | EGFP/EcoRI         | SART1Bm 3' UTR                           | Telomeric repeats               | Clone |
|----------|--------------------|------------------------------------------|---------------------------------|-------|
| AGG      | ---TACAAGTAAGaattc | GGACCGT---TG <u>AGG</u> <sup>-394*</sup> | <u>AGG</u> (TTAGG) <sub>6</sub> | 1     |
|          | ---TACAAGTAAGaattc | GGACCGT---TG <u>AGG</u> <sup>-394*</sup> | <u>AGG</u> (TTAGG) <sub>9</sub> | 1     |
|          | ---TACAAGTAAGaattc | GGACCGT---GATACC (A) <sub>15</sub>       | AGG(TTAGG) <sub>5</sub>         | 1     |
|          | ---TACAAGTAAGaattc | GGACCGT---GATACC (A) <sub>17</sub>       | AGG(TTAGG) <sub>6</sub>         | 1     |
|          | ---TACAAGTAAGaattc | GGACCGT---GATACC (A) <sub>16</sub>       | AGG(TTAGG) <sub>3</sub>         | 1     |
|          | ---TACAAGTAAGaattc | GGACCGT---GATACC (A) <sub>24</sub>       | AGG(TTAGG) <sub>12</sub>        | 1     |
|          | ---TACAAGTAAGaattc | GGACCGT---GATACC (A) <sub>23</sub>       | AGG(TTAGG) <sub>12</sub>        | 1     |
|          | ---TACAAGTAAGaattc | GGACCGT---GATACC (A) <sub>16</sub>       | AGG(TTAGG) <sub>54</sub>        | 1     |
| C-18     | ---TACAAGTAAGaattc | GGACCGT---AT <u>AGG</u> <sup>-233*</sup> | <u>AGG</u> (TTAGG) <sub>8</sub> | 1     |
|          | ---TACAAGTAAGaattc | GGACCGT---GATACC (A) <sub>14</sub>       | AGG(TTAGG) <sub>4</sub>         | 1     |
|          | ---TACAAGTAAGaattc | GGACCGT---GATACC (A) <sub>62</sub>       | AGG(TTAGG) <sub>8</sub>         | 1     |
|          | ---TACAAGTAAGaattc | GGACCGT---GATACC (A) <sub>29</sub>       | AGG(TTAGG) <sub>8</sub>         | 1     |
|          | ---TACAAGTAAGaattc | GGACCGT---GATACC (A) <sub>24</sub>       | AGG(TTAGG) <sub>8</sub>         | 1     |
|          | ---TACAAGTAAGaattc | GGACCGT---GATACC (A) <sub>8</sub>        | AGG(TTAGG) <sub>16</sub>        | 1     |
|          | ---TACAAGTAAGaattc | GGACCGT---GATACC (A) <sub>19</sub>       | AGG(TTAGG) <sub>23</sub>        | 1     |
|          | ---TACAAGTAAGaattc | GGACCGT---GATACC (A) <sub>12</sub>       | AGG(TTAGG) <sub>25</sub>        | 1     |
|          | ---TACAAGTAAGaattc | GGACCGT---GATACC (A) <sub>40</sub>       | AGG(TTAGG) <sub>40</sub>        | 1     |

\*Nucleotide positions are indicated with the junction of cleavage target site AGG and 3'UTR end, defined as 0. The telomeric repeat-like sequences AGG in the end of inserted copies are underlined and indicated at upstream -394 and -233.
